# Supplementary material for: Change of Characterization and Film Morphology Based on Acrylic Pressure Sensitive Adhesives by Hydrophilic Derivative Ratio
Source: MDPI journal article supplement (doi:10.3390/polym12071504), 2020-07-07
Supplement: s1 [file s1]

## Correlation between Surface Wettability and Orientation of Acrylic Pressure Sensitive Adhesives by Hydrophilic Derivative Ratio

Woong Cheol Seok<sup>1,2</sup>, Jong Tae Leem<sup>1,2</sup>, Ju Hui Kang<sup>1</sup>, Young Jun Kim<sup>2</sup>, Sangkug Lee<sup>1</sup> and Ho Jun Song<sup>1,\*</sup>

<sup>1</sup> Green and Sustainable Materials R&D Department/Research Institute of Clean Manufacturing System, Korea Institute of Industrial Technology, 89 Yangdaegiro-gil, Ipjang-myeon, Seobuk-gu, Cheonan-si, Chungcheongnam-do, 331-822, Republic of Korea

<sup>2</sup> School of Chemical Engineering, Sungkyunkwan University, 2066, Seobu-ro Jangan-gu, Suwon-si, Gyeonggi-do, 440-746, Republic of Korea

Phone : 82-41-589-8467; Fax: 82-41-589-8550; E-mail: song3026@kitech.re.kr\*

\*Corresponding Author

Ph. D. Ho Jun Song, E-mail : song3026@kitech.re.kr

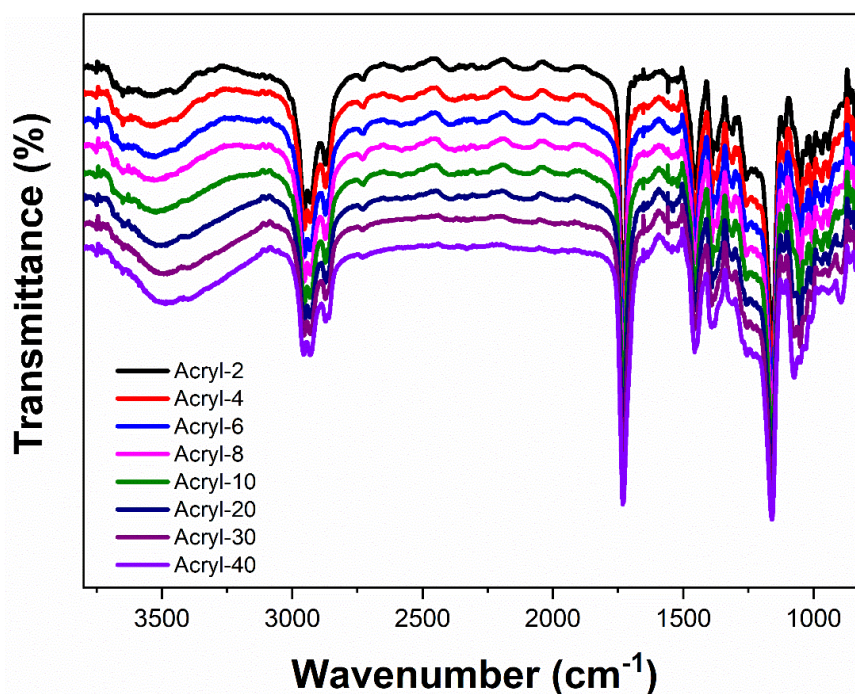

**Figure S1.** FT-IR spectrum of acrylic PSA films for HEA content; total region.

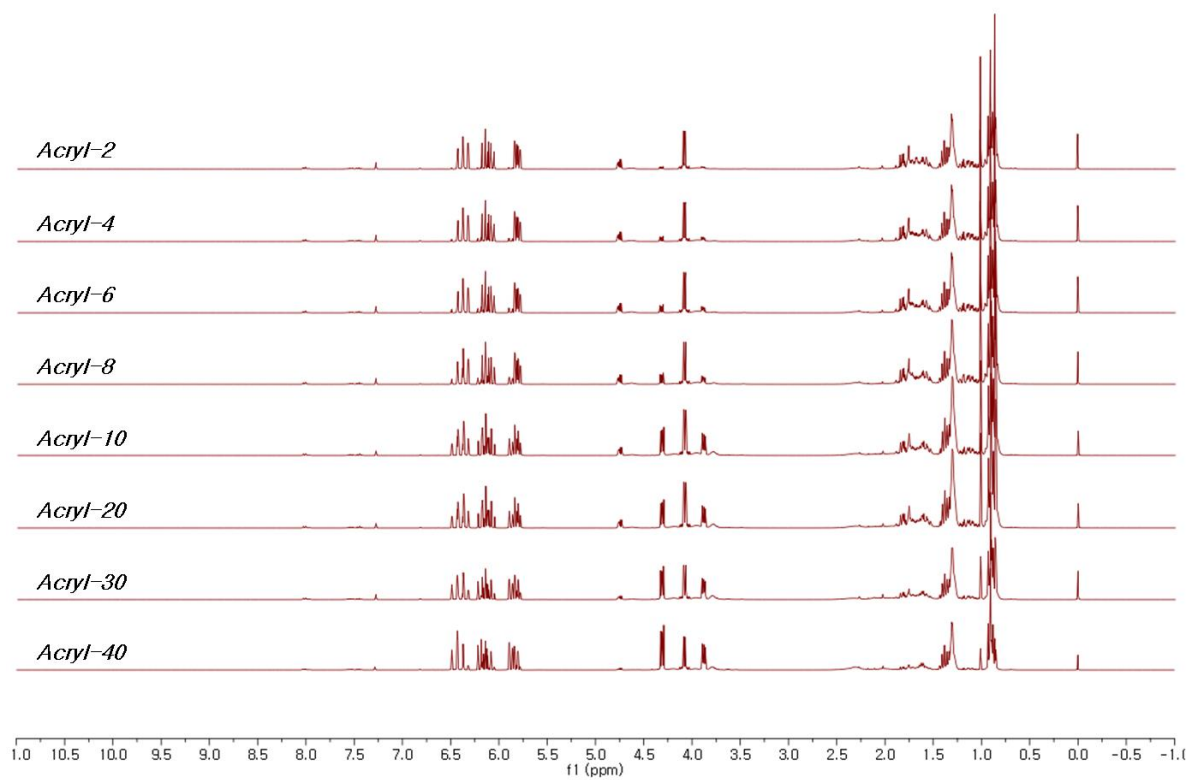

**Figure S2.** <sup>1</sup>H-NMR spectrum of acrylic pre-polymers for HEA content.
